# Supplementary material for: Prediction of Both E-Jet Printing Ejection Cycle Time and Droplet Diameter Based on Random Forest Regression
Source: MDPI journal article supplement (doi:10.3390/mi14030623), 2023-03-08
Supplement: s1 [file s1]

## Supporting Information

### Prediction of Droplet Ejection Cycle and Diameter for Electrohydrodynamic Jet Printing Based on Random Forest Regression

Yuanfen Chen, Zongkun Lao, Renzhi Wang, Jinwei Li, Jingyao Gai, Hui You\*

School of Mechanical Engineering, Guangxi University, Nanning, 530004, China

\* Correspondence: usmlhy@iim.ac.cn (H.Y.)

Table S1 The compositions and properties of the liquids used in the experiments

| Glycerol(mL) | NaCl aqueous solution( $\mu$ L) | deionized water( $\mu$ L) | Conductivity ( $\mu$ S/cm) | Density ( $\text{Kg/m}^3$ ) | Viscosity ( $\text{mPa}\cdot\text{s}$ ) | Surface tension ( $\text{mN/m}$ ) |
|--------------|---------------------------------|---------------------------|----------------------------|-----------------------------|-----------------------------------------|-----------------------------------|
| 5            | 65                              | 1935                      | 5                          | 1223.9                      | 35                                      | 66.7                              |
| 5            | 140                             | 1860                      | 10                         | 1223.9                      | 35                                      | 66.7                              |
| 5            | 205                             | 1795                      | 15                         | 1223.9                      | 35                                      | 66.7                              |
| 5            | 105                             | 1395                      | 5                          | 1231.6                      | 50                                      | 67.3                              |
| 5            | 205                             | 1295                      | 10                         | 1231.6                      | 50                                      | 67.3                              |
| 5            | 250                             | 1250                      | 15                         | 1231.6                      | 50                                      | 67.3                              |
| 5            | 125                             | 1135                      | 5                          | 1238.9                      | 65                                      | 66.9                              |
| 5            | 265                             | 985                       | 10                         | 1238.9                      | 65                                      | 66.9                              |
| 5            | 410                             | 840                       | 15                         | 1238.9                      | 65                                      | 66.9                              |

Table S2 Experimental and predicted values of the ejection cycle

| Sample number | Experimental Injection Cycle(ms) | Predicted Injection Cycle of RFR (ms) | Predicted Injection Cycle of CART (ms) | Predicted Injection Cycle of SVR (ms) | Predicted Injection Cycle of ANN (ms) |
|---------------|----------------------------------|---------------------------------------|----------------------------------------|---------------------------------------|---------------------------------------|
| 1             | $0.284 \pm 0.013$                | 0.265                                 | 0.228                                  | 0.283                                 | 0.270                                 |
| 2             | $0.876 \pm 0.023$                | 0.866                                 | 0.952                                  | 0.748                                 | 0.831                                 |
| 3             | $0.355 \pm 0.016$                | 0.324                                 | 0.385                                  | 0.488                                 | 0.402                                 |
| 4             | $1.98 \pm 0.034$                 | 2.048                                 | 1.49                                   | 2.240                                 | 2.178                                 |
| 5             | $0.556 \pm 0.013$                | 0.541                                 | 0.616                                  | 0.619                                 | 0.615                                 |
| 6             | $1.22 \pm 0.034$                 | 1.207                                 | 0.996                                  | 0.824                                 | 1.829                                 |
| 7             | $0.472 \pm 0.017$                | 0.486                                 | 0.500                                  | 0.481                                 | 0.437                                 |
| 8             | $1.224 \pm 0.021$                | 1.313                                 | 1.470                                  | 1.288                                 | 1.168                                 |
| 9             | $0.312 \pm 0.017$                | 0.296                                 | 0.264                                  | 0.336                                 | 0.405                                 |

Table S3 Experimental and predicted values of the droplet diameter

| Sample number | Experimental droplet diameter ( $\mu\text{m}$ ) | Predicted droplet diameter of RFR ( $\mu\text{m}$ ) | Predicted droplet diameter of CART ( $\mu\text{m}$ ) | Predicted droplet diameter of SVR ( $\mu\text{m}$ ) | Predicted droplet diameter of ANN ( $\mu\text{m}$ ) |
|---------------|-------------------------------------------------|-----------------------------------------------------|------------------------------------------------------|-----------------------------------------------------|-----------------------------------------------------|
| 1             | $28.353 \pm 0.099$                              | 29.153                                              | 28.170                                               | 30.131                                              | 29.639                                              |
| 2             | $27.555 \pm 0.304$                              | 27.270                                              | 26.409                                               | 28.591                                              | 28.942                                              |
| 3             | $22.874 \pm 0.098$                              | 23.179                                              | 23.427                                               | 25.042                                              | 24.046                                              |
| 4             | $29.688 \pm 0.269$                              | 28.947                                              | 28.906                                               | 29.860                                              | 30.865                                              |
| 5             | $24.469 \pm 0.643$                              | 24.344                                              | 23.548                                               | 27.325                                              | 26.841                                              |
| 6             | $24.432 \pm 0.206$                              | 26.540                                              | 27.017                                               | 26.179                                              | 25.554                                              |
| 7             | $26.827 \pm 0.605$                              | 25.622                                              | 25.601                                               | 28.609                                              | 28.016                                              |
| 8             | $31.188 \pm 0.202$                              | 30.438                                              | 30.581                                               | 31.705                                              | 31.951                                              |
| 9             | $27.980 \pm 0.360$                              | 28.630                                              | 27.792                                               | 29.468                                              | 28.580                                              |

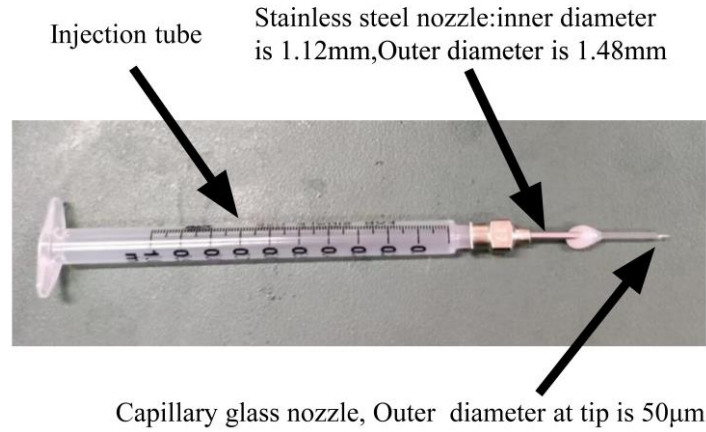

Figure S1. Nozzle connection diagram

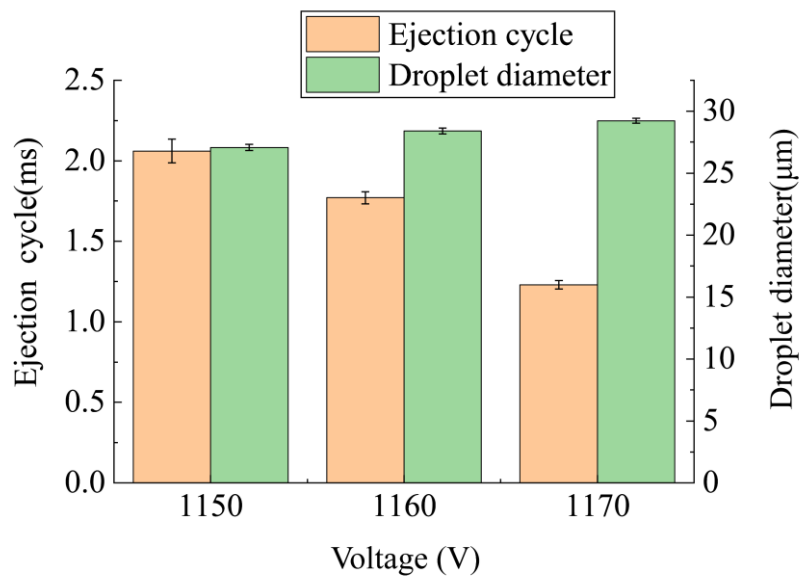

Figure S2. Variation of ejection cycle and droplet diameter with voltage (viscosity is 65 mPa·s, conductivity is 10  $\mu\text{S}/\text{cm}$ , and nozzle-to-substrate distance is 300  $\mu\text{m}$ ).

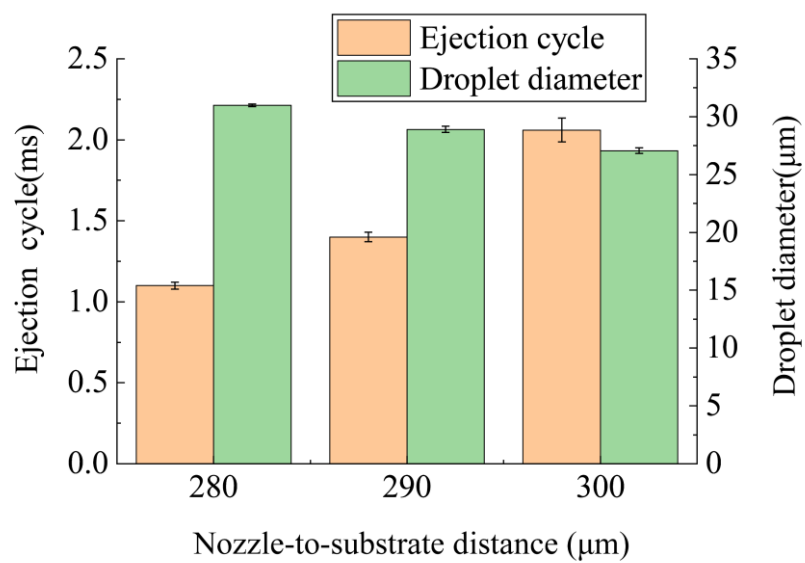

Figure S3. Variation of ejection cycle and droplet diameter with nozzle-to-substrate distance (viscosity is 65 mPa·s, conductivity is 10 μS/cm, voltage is 1150V).
